# Supplementary material for: Potential Role of a Bistable Histidine Kinase Switch in the Asymmetric Division Cycle of Caulobacter crescentus
Source: PubMed Central journal article supplement (PMC3772055; doi:10.1371/journal.pcbi.1003221), 2013-09-12

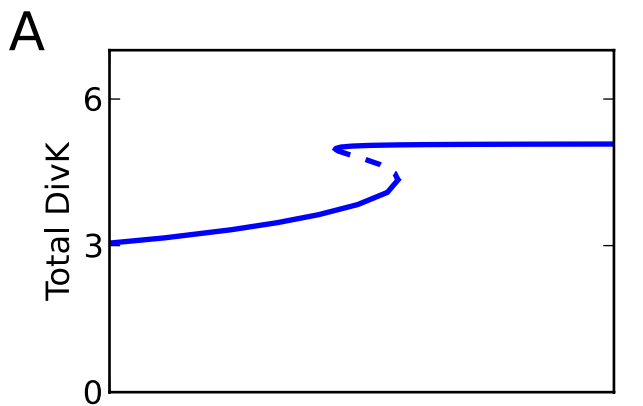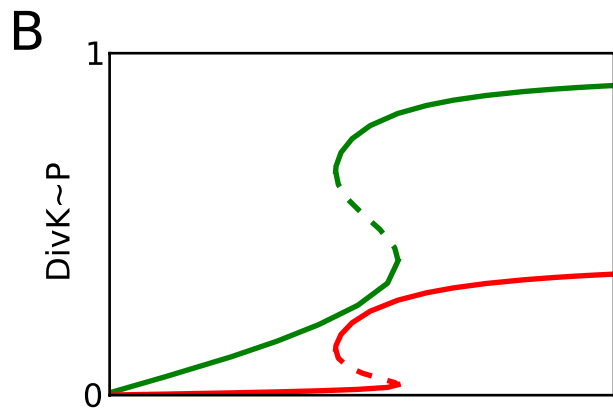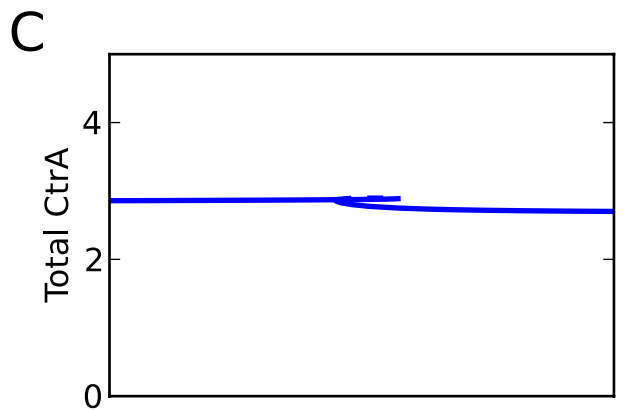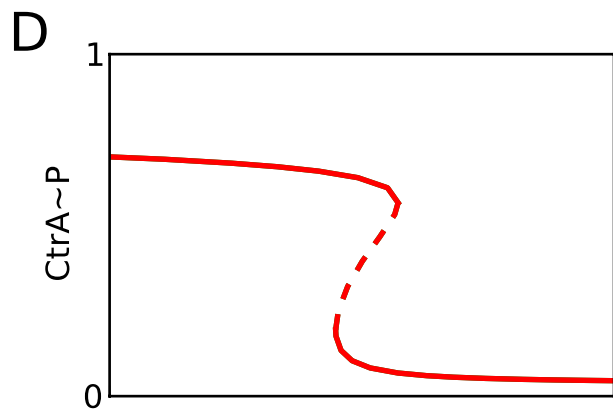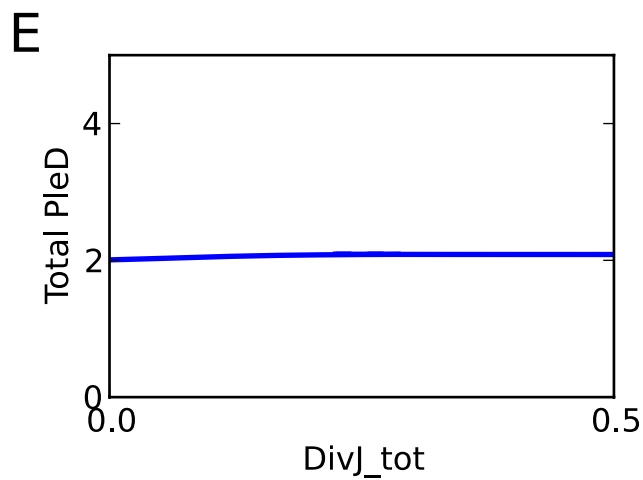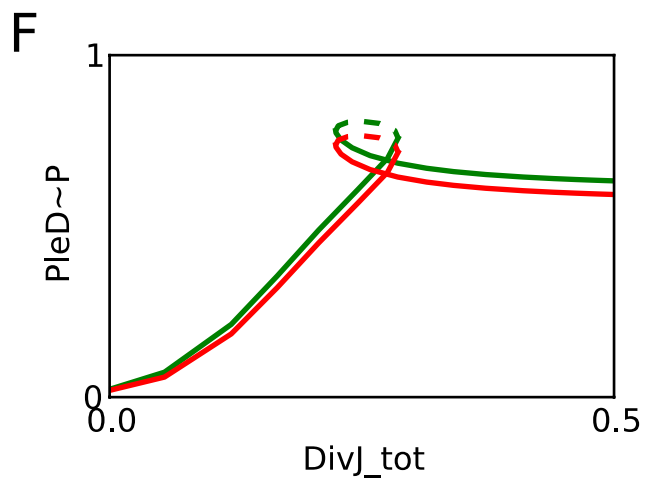

Supplement: pcbi.1003221.s006.pdf [file pcbi.1003221.s006.pdf]
