# Supplementary material for: Potential Role of a Bistable Histidine Kinase Switch in the Asymmetric Division Cycle of Caulobacter crescentus
Source: PLoS Comput Biol. 2013 Sep 12;9(9):e1003221. doi: 10.1371/journal.pcbi.1003221 (PMC3772055; doi:10.1371/journal.pcbi.1003221)
Supplement: Table S1 — Description of species in the model with their abbreviated names. (DOCX) [file pcbi.1003221.s007.docx]

| **Table S1**: Description of species in the model with their abbreviated names | | |
| --- | --- | --- |
| DivK~P |  | dk |
| DivK |  | dkp |
| PleC | PleC:PleC (phosphatase) | pc |
| PleCph1 | PleC:PleC:DivK~P | ph1 |
| PleCph2 | PleC:PleC:DivK | ph2 |
| PleCph11 | DivK~P:PleC:PleC:DivK~P (phosphatase) | ph11 |
| PleCph12 | DivK:PleC:PleC:DivK~P (phosphatase) | ph12 |
| PleCph22 | DivK:PleC:PleC:DivK (phosphatase) | ph22 |
| PleCph1p | PleC:PleC~P (phosphatase form) | ph1p |
| PleCph2p | PleC~P:PleC~P (phosphatase form) | ph2p |
| PleCkin | PleC:PleC (kinase) | pck |
| PleCpkdk | PleC:PleC:DivK | pkdk |
| PleCkin11 | DivK~P: PleC:PleC: DivK~P (kinase) | pk11 |
| PleCkin12 | DivK: PleC:PleC: DivK~P (kinase) | pk12 |
| PleCkin22 | DivK:PleC: PleC: DivK (kinase) | pk22 |
| PleCkin0 | DivK~P: PleC~P:PleC~P: DivK~P | pk0 |
| PleCkin1 | PleC~P:PleC~P: DivK~P | pk1 |
| PleCkin2 | DivK: PleC~P:PleC~P: DivK~P | pk2 |
| PleCkin3 | PleC~P:PleC~P: DivK | pk3 |
| PleCkin4 | DivK: PleC~P:PleC~P: DivK | pk4 |
| PleCpt2 | DivK~P: PleC:PleC~P: DivK~P | pt2 |
| PleCpt3 | PleC~P:PleC: DivK~P | pt3 |
| PleCpt4 | DivK:PleC~P:PleC: DivK~P | pt4 |
| PleCpt3h | DivK~P:PleC:PleC | pt3h |
| PleCk1h | PleC:PleC~P: DivK~P | pk1h |
| PleCk3h | DivK:PleC~P:PleC | pk3h |
| PleCkin1p | PleC:PleC~P (kinase form) | pk1p |
| PleCkin2p | PleC~P:PleC~P (kinase form) | pk2p |
| PleD |  | pld |
| PleD~P |  | pldp |
| PleCkin5 | DivK~P:PleC~P:PleC~P:PleD | pk5 |
| PleCkin6 | DivK:PleC~P:PleC~P:PleD | pk6 |
| PleCpt5 | DivK~P:PleC~P:PleC:PleD~P | pt5 |
| PleCpt6 | DivK:PleC~P:PleC:PleD~P | pt6 |
| DivJ |  | dj |
| DivK:DivK |  | jk |
| DivL |  | dl |
| DivL:DivK~P | DivL:DivK~P | dldk |
| CtrA |  | ctr |
| CtrA~P |  | ctrp |
| CpdR |  | cpd |
| CpdR~P |  | cpdp |
| CckA kin |  | ck |
| CckA phos |  | cp |
| CckA kin1 | CckA~P:CtrA | ck1 |
| CckA kin2 | CckA~P:CpdR | ck2 |
| CckA ct1 | CckA:CtrA~P (kinase) | ct1 |
| CckA ct2 | CckA:CpdR~P (kinase) | ct2 |
| CckA ph1 | CckA:CtrA~P (phosphatase) | ch1 |
| CckA ph2 | CckA:CpdR~P (phosphatase) | ch2 |
| Phos | Generic phosphatase | phos |
