# Supplementary material for: Potential Role of a Bistable Histidine Kinase Switch in the Asymmetric Division Cycle of Caulobacter crescentus
Source: PLoS Comput Biol. 2013 Sep 12;9(9):e1003221. doi: 10.1371/journal.pcbi.1003221 (PMC3772055; doi:10.1371/journal.pcbi.1003221)
Supplement: Table S2 — Representative reactions in the model. (DOCX) [file pcbi.1003221.s008.docx]

| **Table S2.** Representative reactions in the model | | | |
| --- | --- | --- | --- |
| **Phosphorylation reactions** |  |  |  |
|  |  |  | (R1) |
|  |  |  | (R2) |
|  |  |  | (R3) |
| **R0 🡪 T0 reaction** |  |  |  |
|  |  |  | (R4) |
| **Typical ligand binding reactions** |  |  |  |
|  |  |  | (R5) |
|  |  |  | (R6) |
|  |  |  | (R7) |
|  |  |  | (R8) |
| **Phosphatase reaction** |  |  |  |
|  |  |  | (R9) |
| **Phosphotransfer reaction** |  |  |  |
|  |  |  | (R10) |
| **Auto-dephosphorylation reaction** |  |  |  |
|  |  | irreversible | (R11) |
