# Supplementary material for: Potential Role of a Bistable Histidine Kinase Switch in the Asymmetric Division Cycle of Caulobacter crescentus
Source: PLoS Comput Biol. 2013 Sep 12;9(9):e1003221. doi: 10.1371/journal.pcbi.1003221 (PMC3772055; doi:10.1371/journal.pcbi.1003221)
Supplement: Table S4 — Equations governing the full model. (DOCX) [file pcbi.1003221.s010.docx]

| **Table S4:** Equations governing the full model * | |
| --- | --- |
|  | 1 |
|  | 2 |
|  | 3 |
|  | 4 |
|  | 5 |
|  | 6 |
|  | 7 |
|  | 8 |
|  | 9 |
|  | 10 |
|  | 11 |
|  | 12 |
|  | 13 |
|  | 14 |
|  | 15 |
|  | 16 |
|  | 17 |
|  | 18 |
|  | 19 |
|  | 20 |
|  | 21 |
|  | 22 |
|  | 23 |
|  | 24 |
|  | 25 |
|  | 26 |
|  | 27 |
|  | 28 |
|  | 29 |
|  | 30 |
|  | 31 |
|  | 32 |
|  | 33 |
|  | 34 |
|  | 35 |
|  | 36 |
|  | 37 |
|  | 38 |
|  | 39 |
|  | 40 |
|  | 41 |
|  | 42 |
|  | 43 |
|  | 44 |
|  | 45 |
|  | 46 |
|  | 47 |
|  | 48 |
|  | 49 |
|  | 50 |
|  | 51 |
|  | 52 |
| * Equations are ordered as the corresponding variables appear from left to right in Figure S1. |  |
