# Supplementary material for: Potential Role of a Bistable Histidine Kinase Switch in the Asymmetric Division Cycle of Caulobacter crescentus
Source: PLoS Comput Biol. 2013 Sep 12;9(9):e1003221. doi: 10.1371/journal.pcbi.1003221 (PMC3772055; doi:10.1371/journal.pcbi.1003221)
Supplement: Table S7 — Basal parameter values used in the reduced model. (DOCX) [file pcbi.1003221.s013.docx]

| **Table S7:** Basal parameter values used in the reduced model* | | | | | | | |
| --- | --- | --- | --- | --- | --- | --- | --- |
| *k*pc-ph1 | 5 | *k*ph1-pc | 5 | *k*j-jk | 1 | *k*jk-j | 0.1 |
| *k*ph1-pk11 | 5 | *k*pk11-ph1 | 2.5 | *k*pk0-pk1 | 0.16 | *k*pk1-pk0 | 5 |
| *k*pk1-pk2 | 5 | *k*pk2-pk1 | 0.0016 | *k*pk1-pk1h | 5 | *k*pk1h-pk1 | 5 |
| *k*pk1-pk2p | 0.16 | *k*pk2p-pk1 | 5 | *k*pk2-pt2 | 5 | *k*pt2-pk2 | 0.16 |
| *k*pt2-pk1h | 0.16 | *k*pk1h-pt2 | 5 | *k*pk2p-pc | 5 | *k*pk1p-pc | 5 |
| *k*pk2-pk3 | 0.16 | *k*pk3-pk2 | 5 | *k*pk3-pk2p | 0.0016 | *k*pk2p-pk3 | 5 |
| *k*pk3-pt3 | 5 | *k*pt3-pk3 | 0.16 | *k*pt3-pk1p | 0.16 | *k*pk1p-pt3 | 5 |
| *k*pk1p-pk1h | 5 | *k*pk1h-pk1p | 0.16 | *k*ph2-pk22 | 0.016 | *k*pk22-ph2 | 1.6-08 |
| *k*pk3-pk4 | 5 | *k*pk4-pk3 | 0.0016 | *k*pk4-pt4 | 5 | *k*pt4-pk4 | 0.16 |
| *k*pt4-pk11 | 5 | *k*pk11-pt4 | 0.0775 | *k*pc-ph2 | 0.5 | *k*ph2-pc | 5 |
| *k*ph2-pk12 | 1.6 | *k*pk12-ph2 | 1.6e-04 | *k*ph1-pk12 | 1.6e-02 | *k*pk12-ph1 | 1.6e-04 |
| *k*pt4-pk3h | 0.16 | *k*pk3h-pt4 | 5 | *k*pk3-pk3h | 5 | *k*pk3h-pk3 | 5 |
| *k*pk1p-pk3h | 5 | *k*p3h-pk1p | 0.0016 | *k*ph1-ph2 | 10 | *k*ph2-ph1 | 5e-03 |
| *k*pk11-pk0 | 2.5 | *k*pk0-pk11 | 5 | *k*pk12-pk2 | 5 | *k*pk2-pk12 | 5 |
| *k*syn-pld | 0.01 | *k*deg-pldp | 0.005 | *k*deg-pldp | 0.005 | *k*phos-ph3 | 1 |
| *k*ph3-phos | 0.1 | *k*pk1-pk5 | 10 | *k*pk5-pk1 | 0.31 | *k*pk5-pt5 | 10 |
| *k*pt5-pk5 | 0.31 | *k*pt5-pk1h | 10 | *k*pk1h-pt5 | 0.31 | *k*pk3-pk6 | 10 |
| *k*pk6-pk3 | 0.31 | *k*pk6-pt6 | 10 | *k*pt6-pk6 | 0.31 | *k*pt6-pk3h | 10 |
| *k*pk3h-pt6 | 0.31 | *k*e-ph3 | 0.2 |  |  |  |  |
| *k*syn-dk | 0.015 | *k*deg-dk | 0.005 | *k*deg-dkp | 0.005 | *k*h1-h2 | 1.6e-02 |
| *k*h2-h1 | 1.6 | *k*e-jin | 0.5 | *k*pk22-pk4 | 5 | *k*pk4-pk22 | 5 |
| *k*dl-dldk | 1 | *k*dldk_dl | 0.1 | *k*syndl | 0.005 | *k*degdl | 0.005 |
| *k*cp-ck | 1 | *k*cp-ck | 0.1 | *k*cp-ch2 | 1 | *k*ch2-cp | 0.1 |
| *k*syn-ctra | 0.05 | *k*deg-ctr | 0.02 | *k*deg-ctrp | 0.02 | *k*syn-cpdr | 0.05 |
| *k*deg-cpdr | 0.02 | *k*deg-cpdp | 0.02 | *k*ck-ck1 | 1 | *k*ck1-ck | 0.1 |
| *k*ck1-ct1 | 1 | *k*ct1-ck1 | 0.1 | *k*ct1-ck | 1 | *k*ck-ct1 | 0.1 |
| *k*cp-ch1 | 1 | *k*ch1-cp | 0.1 | *k*e-ch1 | 1 | *k*ck-ck2 | 1 |
| *k*ck2-ck | 0.1 | *k*ck2-ct2 | 1 | *k*ct2-ck2 | 0.1 | *k*ct2-ck | 1 |
| *k*ck-ct2 | 0.1 | *k*e-ch2 | 1 |  |  |  |  |
| DivJ_tot | 0.5 | PleC_tot | 1 | CckA_tot | 1 | Phos_tot | 0.1 |
| *K*dl | 0.75 |  |  |  |  |  |  |
| *For each reaction of the form the parameters *k*x-y and *k*y-x are the forward and reverse rate constants (min-1). DivJ_tot, PleC_tot, CckA_tot, Phos_tot and *K*dl are dimensionless constants representing concentrations. | | | | | | | |
