# Supplementary material for: Potential Role of a Bistable Histidine Kinase Switch in the Asymmetric Division Cycle of Caulobacter crescentus
Source: PLoS Comput Biol. 2013 Sep 12;9(9):e1003221. doi: 10.1371/journal.pcbi.1003221 (PMC3772055; doi:10.1371/journal.pcbi.1003221)
Supplement: Table S8 — Parameter values used to simulate mutants. (DOCX) [file pcbi.1003221.s014.docx]

| **Table S8:** Parameter values used to simulate mutants* | | | | | | | |
| --- | --- | --- | --- | --- | --- | --- | --- |
| *divKD53N* | | | | | | | |
| *k*pk2-pt2 | 0 | *k*pt2-pk2 | 0 | *k*pk3-pt3 | 0 | *k*pt3-pk3 | 0 |
| *k*pk4-pt4 | 0 | *k*pt4-pk4 | 0 | *k*pt4-pk11 | 0 | *k*pk11-pt4 | 0 |
| *divKD90G* | | | | | | | |
| *k*ph1_pk11 | 2.5 | *k*pk11_ph1 | 49 | *k*ph1_pk12 | 0.016 | *k*pk12_ph1 | 16 |
| *k*ph2_pk22 | 0.025 | *k*pk22_ph2 | 2.5e-03 | *k*ph2_pk12 | 1.6 | *k*pk12_ph2 | 16 |
| *k*h1_h2 | 0.016 | *k*h2_h1 | 1.6 | *k*dl_dldk | 0.1 |  |  |
| *pleC:*Tn*5* | | | | | | | |
| PleC_tot | 0 |  |  |  |  |  |  |
|  | | | | | | | |
| DivJ_tot | 0 |  |  |  |  |  |  |
| *pleCF778L* | | | | | | | |
| *k*pk11-pk0 | 0 | *k*pk0-pk11 | 0 | *k*pk12-pk2 | 0 | *k*pk2-pk12 | 0 |
| *k*pk22-pk4 | 0 | *k*pk4-pk22 | 0 |  |  |  |  |
| *Only parameter values deviating from wild type are listed. | | | | | | | |
